# Supplementary material
Source: PubMed Central journal article supplement (PMC3064538)

## SUPPLEMENTARY DATA

FIGS S1–25. Distribution maps of individuals within each population. Dotted groups indicate identical multi-locus genotypes. Each square represents 10 cm.

Straidkilly S1, 2010

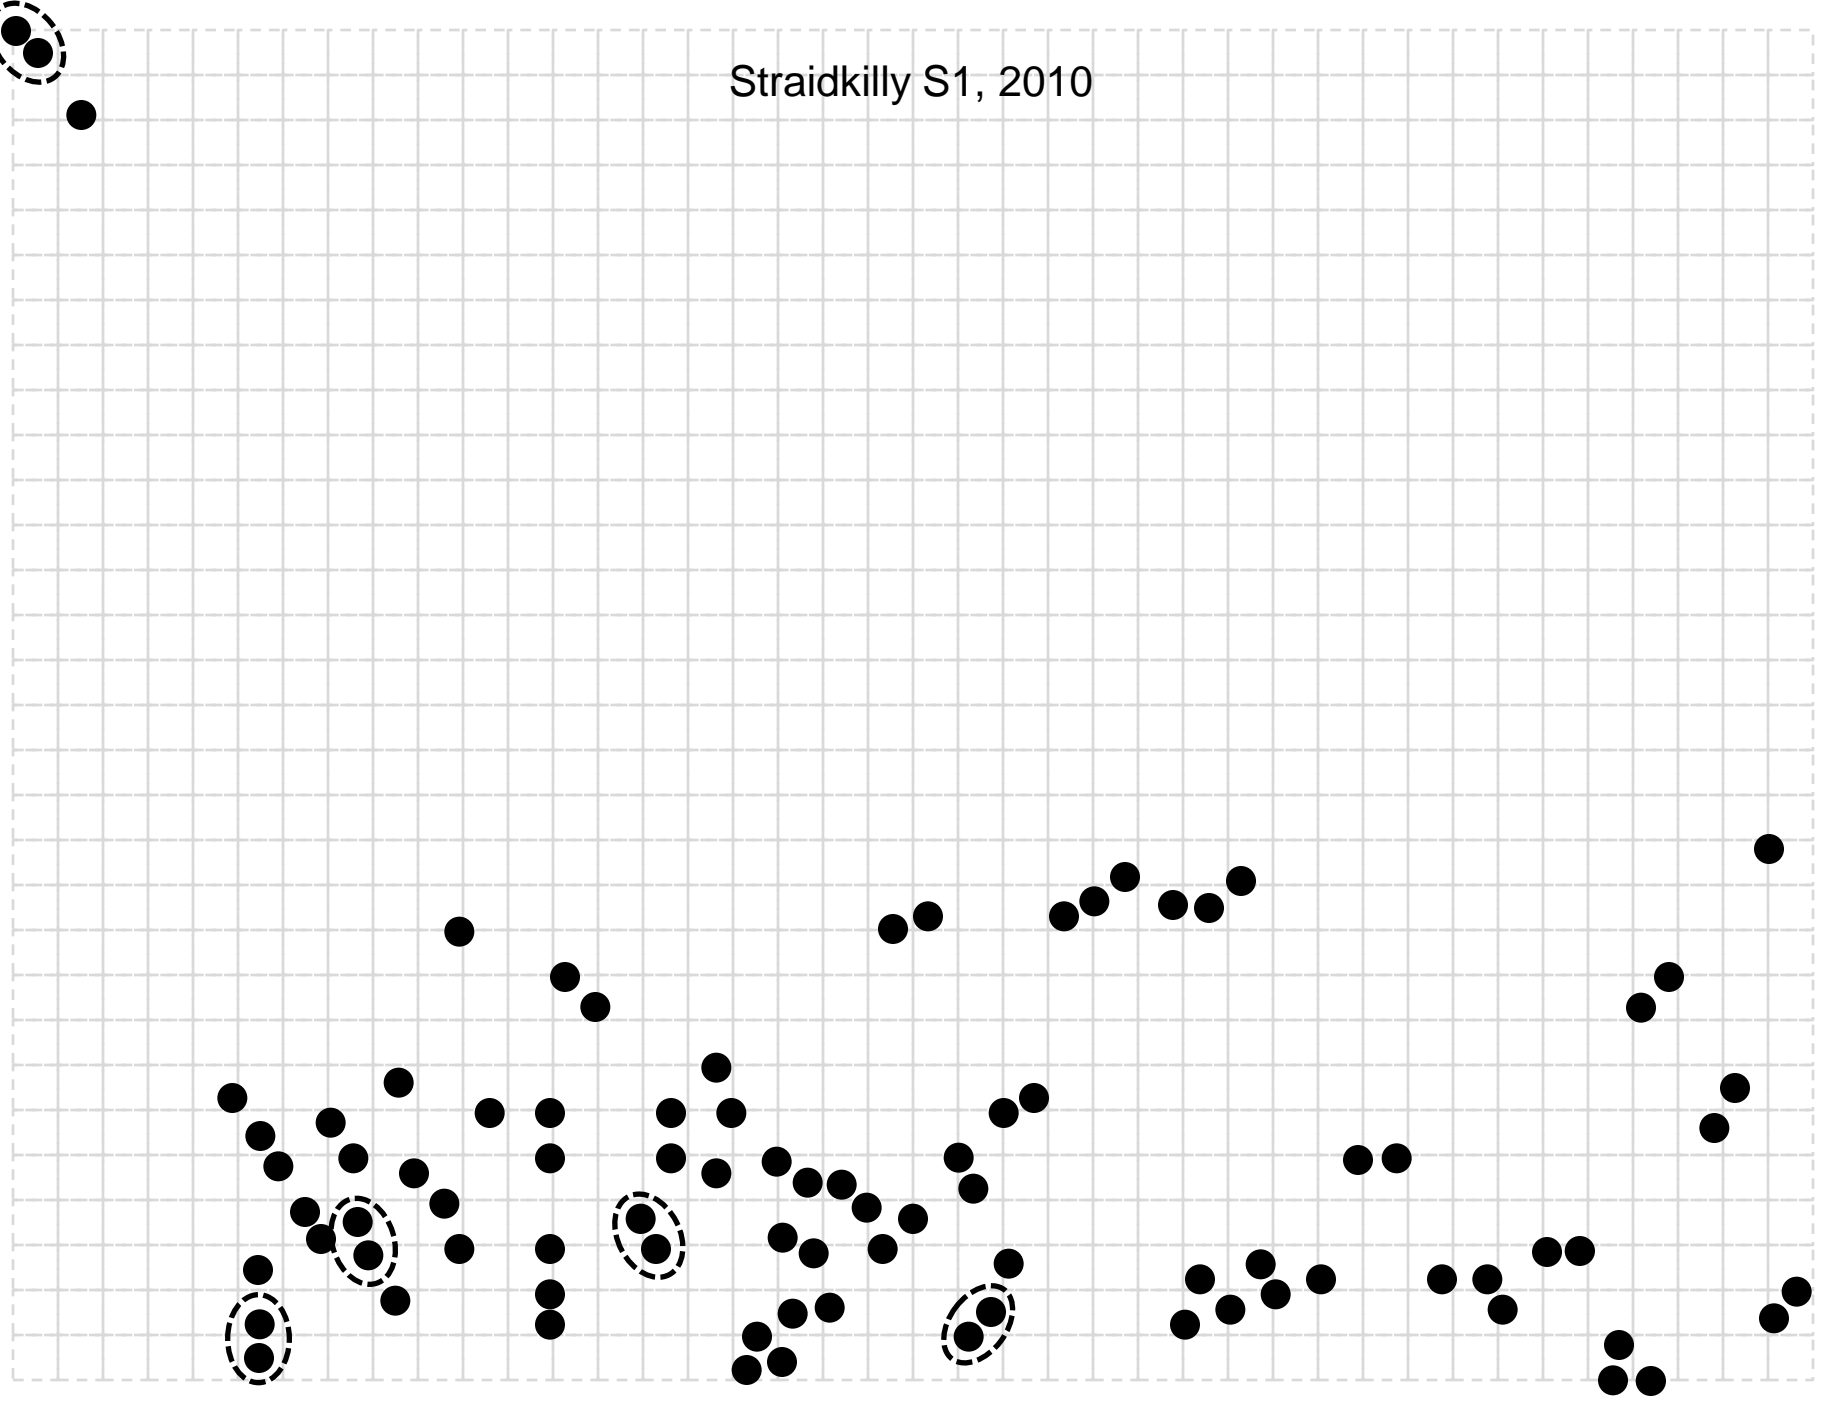

Straidkilly S2, 2009

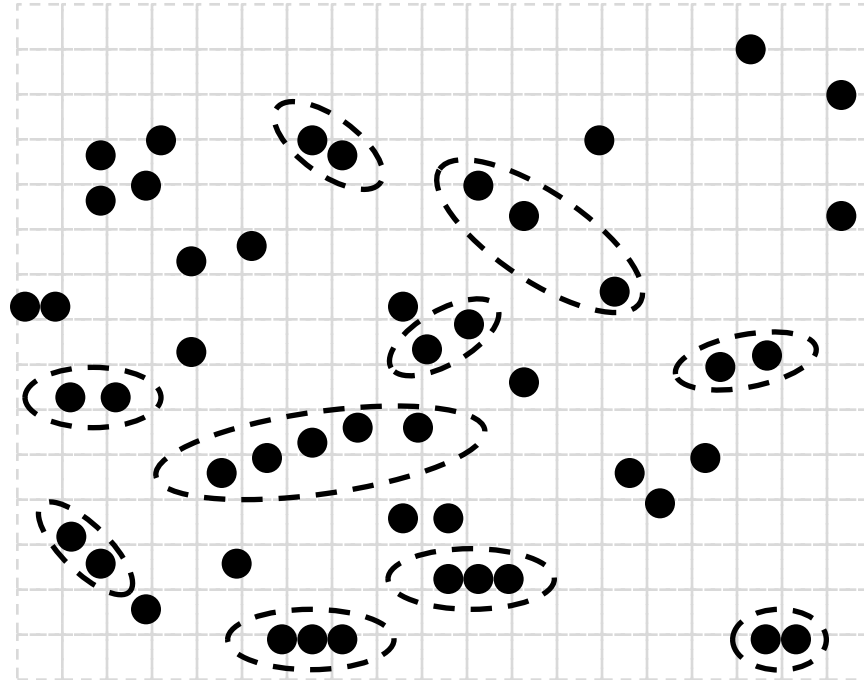

Straidkilly S2, 2010

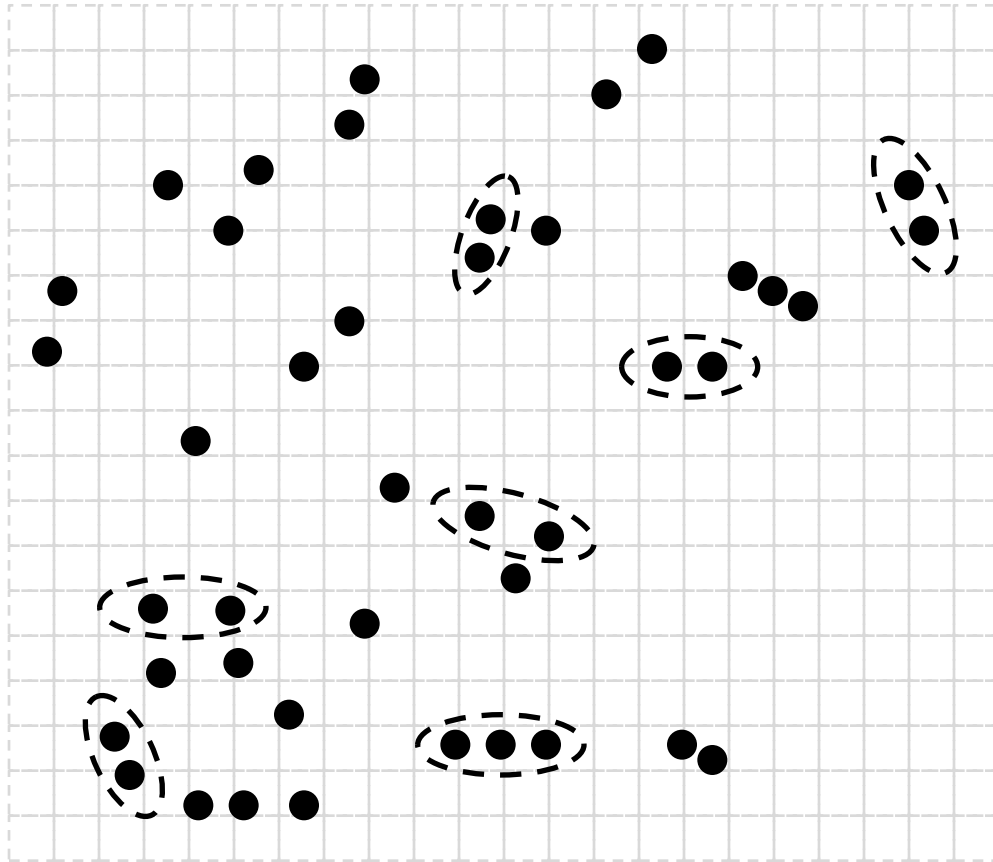

# Straidkilly S3, 2009

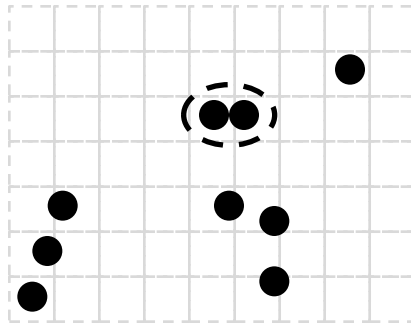

# Straidkilly S3, 2010

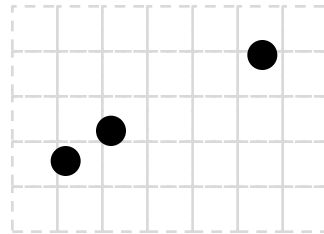

Castle Caldwell CC2, 2007

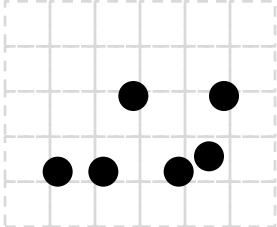

Castle Caldwell CC2, 2008

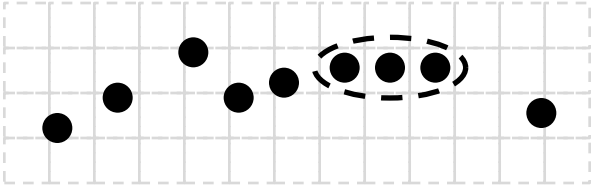



Castle Caldwell CC3, 2007

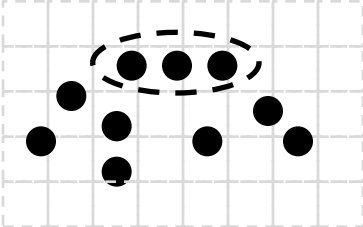

Castle Caldwell CC3, 2008

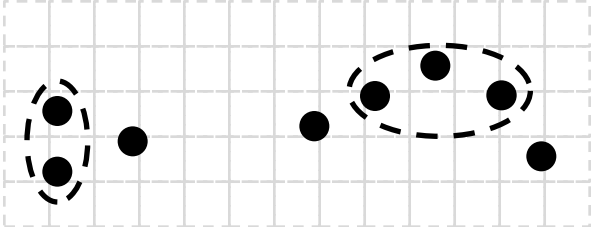

Castle Caldwell CC4, 2007

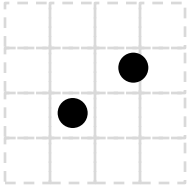

Castle Caldwell CC5, 2007

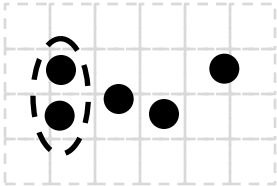

Castle Caldwell CC5, 2008

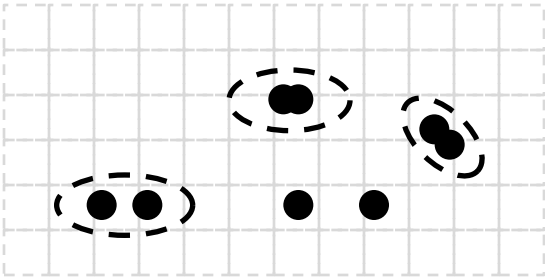

Castle Caldwell CC6, 2007

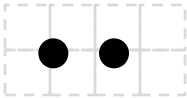

Correl Glen CG1, 2008

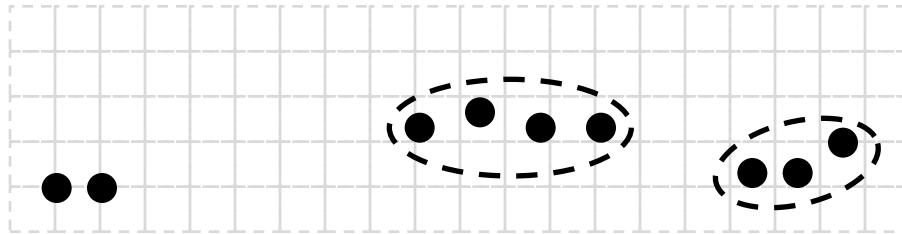

Ely Lodge EL1, 2007

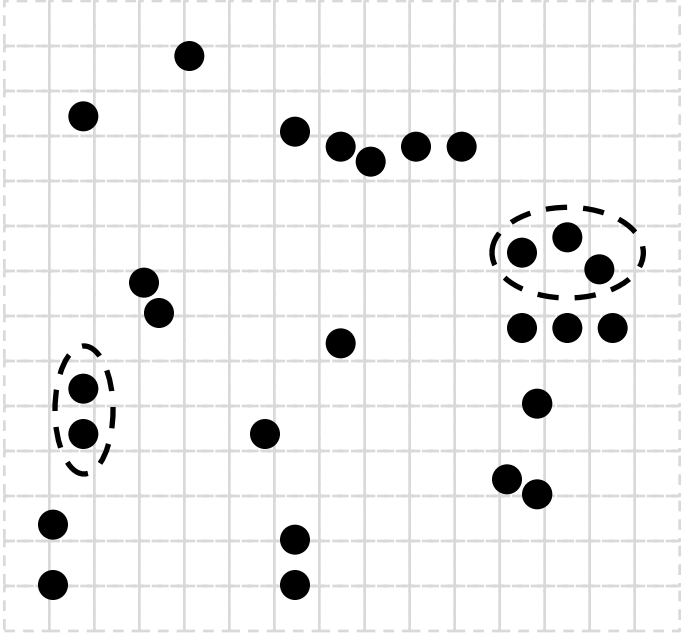



Ely Lodge EL1, 2008

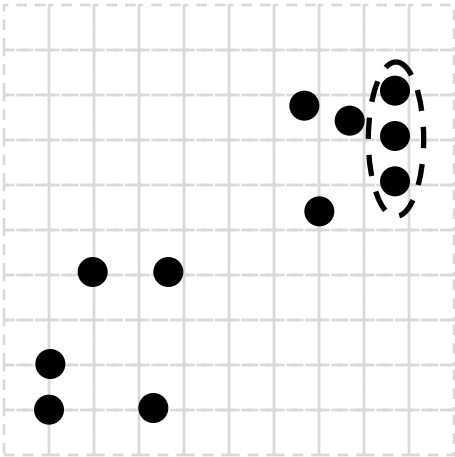

Ely Lodge EL2, 2008

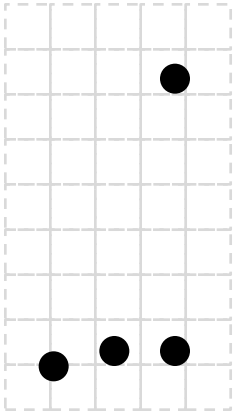

Ely Lodge EL3, 2007

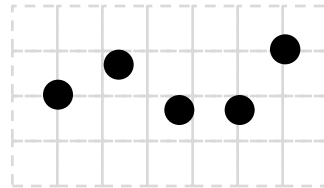

Ely Lodge EL3, 2008

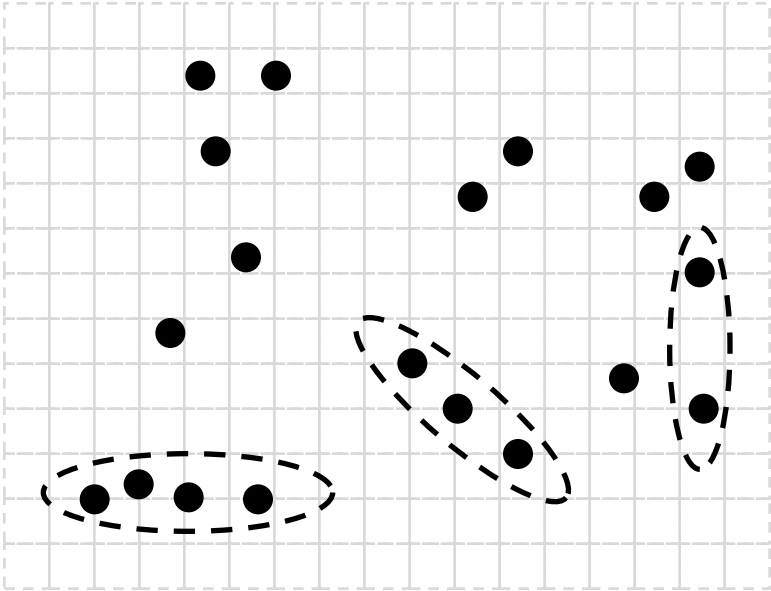

Ely Lodge EL4, 2007

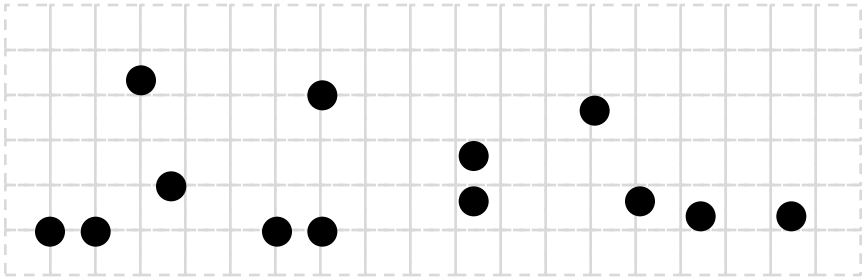

Ely Lodge EL4, 2008

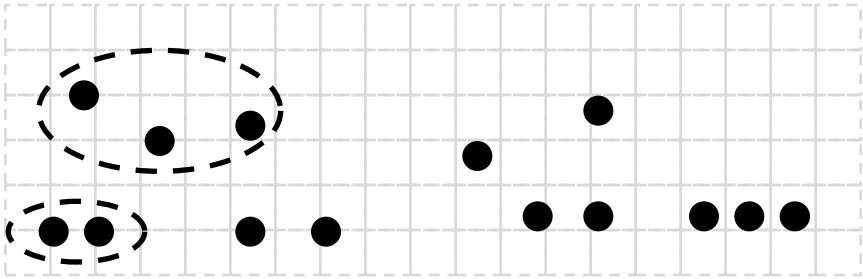

Ely Lodge EL5, 2007

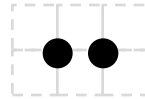

Ely Lodge EL6, 2008

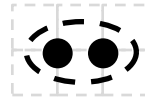



Ely Lodge EL8, 2008

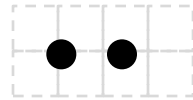

Knockninny K1, 2007



Supplement: supp_mcr003_mcr003supp_figs.pdf [file supp_mcr003_mcr003supp_figs.pdf]
